# Supplementary material for: Coronary Microcirculation in Aortic Stenosis: A Physiological Hornets’ Nest
Source: PubMed Central journal article supplement (PMC6733603; doi:10.1161/circinterventions.118.007547), 2019-08-16
Supplement: hcv-12-e007547-s003.pdf [file hcv-12-e007547-s003.pdf]

THE AMERICAN PHYSIOLOGICAL SOCIETY LICENSE  
TERMS AND CONDITIONS

This Agreement between Hannah ZR McConkey ("You") and The American Physiological Society ("The American Physiological Society") consists of your license details and the terms and conditions provided by The American Physiological Society and Copyright Clearance Center.

**All payments must be made in full to CCC. For payment instructions, please see information listed at the bottom of this form.**

|                                           |                                                                                                                                                                                                            |
|-------------------------------------------|------------------------------------------------------------------------------------------------------------------------------------------------------------------------------------------------------------|
| License Number                            | 4518361425251                                                                                                                                                                                              |
| License date                              | Jan 29, 2019                                                                                                                                                                                               |
| Licensed Content Publisher                | The American Physiological Society                                                                                                                                                                         |
| Licensed Content Publication              | Physiological Reviews                                                                                                                                                                                      |
| Licensed Content Title                    | Regulation of Coronary Blood Flow During Exercise                                                                                                                                                          |
| Licensed Content Author                   | Dirk J. Duncker, Robert J. Bache                                                                                                                                                                           |
| Licensed Content Date                     | Jul 1, 2008                                                                                                                                                                                                |
| Licensed Content Volume                   | 88                                                                                                                                                                                                         |
| Licensed Content Issue                    | 3                                                                                                                                                                                                          |
| Type of Use                               | Journal/Magazine                                                                                                                                                                                           |
| Requestor type                            | author                                                                                                                                                                                                     |
| Readers being charged a fee for this work | No                                                                                                                                                                                                         |
| Format                                    | print and electronic                                                                                                                                                                                       |
| Portion                                   | figures/tables/images                                                                                                                                                                                      |
| Number of figures/tables/images           | 1                                                                                                                                                                                                          |
| Will you be translating?                  | no                                                                                                                                                                                                         |
| World Rights                              | no                                                                                                                                                                                                         |
| Order reference number                    |                                                                                                                                                                                                            |
| Title of new article                      | The Coronary Microcirculation in Aortic Stenosis - a physiological hornet's nest                                                                                                                           |
| Lead author                               | HZR McConkey                                                                                                                                                                                               |
| Title of targeted journal                 | Circulation: Cardiovascular Interventions                                                                                                                                                                  |
| Publisher                                 | Lippincott Williams & Wilkins (LWW)                                                                                                                                                                        |
| Expected publication date                 | Mar 2019                                                                                                                                                                                                   |
| Portions                                  | Figure 9: Graph showing a schematic drawing of the intramyocardial microvasculature (top panel) and the extravascular forces acting on the coronary microvasculature (bottom panel).                       |
| Requestor Location                        | Hannah ZR McConkey<br>The Rayne Institute<br>St Thomas' Hospital<br>Westminster Bridge Road<br>London, London SE1 7EH<br>United Kingdom<br>Attn: Hannah ZR McConkey                                        |
| Billing Type                              | Invoice                                                                                                                                                                                                    |
| Billing Address                           | Hannah ZR McConkey<br>King's College London<br>British Heart Foundation Centre of Excellence<br>Rayne Institute, St. Thomas' Hospital Campus<br>London, United Kingdom SE1 7EH<br>Attn: Hannah ZR McConkey |
| Total                                     | 38.02 GBP                                                                                                                                                                                                  |

Terms and Conditions

Terms and Conditions:

©The American Physiological Society (APS). All rights reserved. The publisher for this requested copyrighted material is APS. By clicking "accept" in connection with completing this license agreement, you agree to the following terms and conditions that apply to this transaction. At the time you opened your Rightslink account you had agreed to the billing and payment terms and conditions of the Copyright Clearance Center (CCC) available at <http://myaccount.copyright.com>

The APS hereby grants to you a nonexclusive limited license to reuse published material as requested by you, provided you have disclosed complete and accurate details of your request, including the figures, tables, images, and /or data in new or derivative works. Licenses are for a one-time English language use with a maximum distribution equal to the number of copies requested. Licenses are issued through the licensing process, unless additional options for translations or World Rights were included in your request. Any form of print or electronic republication must be completed with the permission of the publisher hereof. Copies prepared before then may be distributed thereafter

The following conditions are required for a License of Reuse:

**Attribution:** You must publish in your new or derivative work a citation to the original source of the material(s) being licensed herein, including publication name, author(s), and page number, prominently displayed in the article or within the figure/image legend.

**Abstracts:** APS Journal article abstracts may be reproduced or translated for noncommercial purposes without requesting permission, provided the citation to the original source is included as noted above ("Attribution"). Abstracts or portions of abstracts may not be used in advertisements or commercial promotions.

**Non-profit/noncommercial reuse:** APS grants permission for the free reuse of APS published material in new works published for educational purposes, provided there is no charge and/or the work is not directly or indirectly commercially supported or sponsored. Neither original authors nor non-authors may reuse published material in new works that are commercially sponsored including reuse in a work produced by a commercial publisher without seeking permission.

Video and photographs: Some material published in APS publications may belong to other copyright holders and cannot be republished without their permission. The copyright should be ascertained from the original source by the permission requestor. Videos and podcasts may not be rebroadcast without proper attribution and permission as requested here. For other types of materials, please contact [cvillemez@the-aps.org](mailto:cvillemez@the-aps.org)

Figures/Tables/Images are available to the requestor from the APS journals website at <http://www.the-aps.org/publications/journals/>. The obtaining of content is a separate transaction through Rightslink or CCC, and is the responsibility of the permission seeker. Higher resolution images are available at additional charge from APS; please contact [cvillemez@the-aps.org](mailto:cvillemez@the-aps.org)

Original Authors of Published Works: To see a full list of original authors rights concerning their own published work <http://www.the-aps.org/publications/authorinfo/copyright/>

Content reuse rights awarded by the APS may be exercised immediately upon issuance of this license, provided full disclosure and complete and accurate details of the proposed reuse of the license is finally granted unless and until full payment is received either by the publisher or by CCC as provided in CCC's Billing and Payment Terms and Conditions. If full payment is not received on a timely basis, then any license preliminarily granted shall be deemed automatically revoked and shall be void as if never granted. Further, in the event that you breach any of the terms of any of CCC's Billing and Payment Terms and Conditions, the license is automatically revoked and shall be void as if never granted. Use of materials as described in a revoked license, or the materials beyond the scope of the license, may constitute copyright infringement and the Publisher reserves the right to take action to protect its copyright of its materials.

The APS makes no representations or warranties with respect to the licensed material. You hereby indemnify and agree to hold harmless the publisher and CCC, and their respective employees and agents, from and against any and all claims arising out of your use of the licensed material other than as specifically authorized pursuant to this license.

This license is personal to you /your organization and may not be sublicensed, assigned, or transferred by you /your organization to another person /organization without the express written consent of the publisher.

This license may not be amended except in writing signed by both parties, or in the case of the publisher, by CCC on the publisher's behalf.

The APS reserves all rights not specifically granted in the combination of (i) the license details provided by you and accepted in the course of this licensing transaction, (ii) the terms of the license, and (iii) CCC's Billing and Payment Terms and Conditions.

v1.0

**You will be invoiced within 48 hours of this transaction date. You may pay your invoice by credit card upon receipt of the invoice for this transaction. Please follow the instructions on the invoice for more details.**

**To pay for this transaction now; please remit a copy of this document along with your payment. Payment should be in the form of a check or money order referencing this invoice number RLNK502990196.**

**Make payments to "COPYRIGHT CLEARANCE CENTER" and send to:**

**Copyright Clearance Center  
29118 Network Place  
Chicago, IL 60673-1291**

**Please disregard electronic and mailed copies if you remit payment in advance**

**Questions? [customer@copyright.com](mailto:customer@copyright.com) or +1-855-239-3415 (toll free in the US) or +1-978-646-2777.**

---
